# Supplementary material for: Uptake of SARS-CoV-2 workplace testing programs, March 2020 to March 2021
Source: bioRxiv or medRxiv preprint supplement (doi:10.1101/2021.06.29.21259730), 2021-07-03
Supplement: Supplementary file [file media-1.pdf]

Supplementary Table 1. Internally-developed list of workplace types.

| Name                            | Description                                                                                                                                                                                                                           | Examples of Related NAICS Groups                                                                  |
|---------------------------------|---------------------------------------------------------------------------------------------------------------------------------------------------------------------------------------------------------------------------------------|---------------------------------------------------------------------------------------------------|
| Blue Collar: Indoor             | Work environments in which skilled labour occurs indoors (distancing is difficult, increased transmission due to close-range droplets and long-range aerosols).                                                                       | Factory/Manufacturing (31-33)<br>Warehouse (493)<br>Transportation/Supply Chain (48)              |
| Blue Collar: Outdoor and Indoor | Work environments in which skilled labour occurs both indoors (distancing is difficult, increased transmission due to close-range droplets and long-range aerosols) and outdoors (distancing is more feasible, reduced transmission). | Utilities (22)<br>Oil and Gas (2111)<br>Mining (21)<br>Construction (23)                          |
| Food Processing                 | Food processing plants, agricultural facilities, and other such settings. Can contain a high number of people working within close proximity, in colder and drier air conditions.                                                     | Farms (11)<br>Food Manufacturing (311)                                                            |
| Healthcare                      | Workplaces that include heavy interaction between healthcare professionals and patients.                                                                                                                                              | Healthcare and Social Assistance (62)                                                             |
| Retail and Customer-Facing      | Workplaces where employees frequently interact with a large number of typically local customers or clients.                                                                                                                           | Retail Trade (44-45)                                                                              |
| University                      | Workplaces where a large student body frequently interacts with each other and faculty.                                                                                                                                               | Universities (611310)                                                                             |
| Travel and Entertainment        | Workplaces where a large number of customers from outside the locality heavily interact with employees.                                                                                                                               | Airlines (481111)<br>Airports (48811)<br>Traveler Accommodation (7211)<br>Casinos (71321)         |
| Offices                         | Workplaces where employees work indoors with isolated interaction with other employees. Distancing is possible.                                                                                                                       | Finance and Insurance (52)<br>Scientific Research (5417)<br>Office Administrative Services (5611) |

Supplementary Table 2. Breakdown of tracked companies by workplace type and country.

| <i>Countries</i>      | <i>Blue Collar: Indoor</i> | <i>Blue Collar: Outdoor and Indoor</i> | <i>Food Processing</i> | <i>Healthcare</i> | <i>Office</i> | <i>Retail and Customer-Facing</i> | <i>Travel and Entertainment</i> | <i>University</i> | <i>Other</i> | <i>Total</i> |
|-----------------------|----------------------------|----------------------------------------|------------------------|-------------------|---------------|-----------------------------------|---------------------------------|-------------------|--------------|--------------|
| <i>Canada</i>         | 155                        | 406                                    | 46                     | 33                | 372           | 84                                | 35                              | 12                | 16           | 1159         |
| <i>United States</i>  | 122                        | 89                                     | 26                     | 35                | 143           | 51                                | 40                              | 39                | 25           | 570          |
| <i>China</i>          | 21                         | 10                                     | 10                     | 1                 | 42            | 3                                 | 4                               | 0                 | 0            | 91           |
| <i>Brazil</i>         | 11                         | 14                                     | 5                      | 1                 | 13            | 10                                | 3                               | 0                 | 0            | 57           |
| <i>Japan</i>          | 25                         | 7                                      | 0                      | 0                 | 11            | 2                                 | 0                               | 1                 | 0            | 46           |
| <i>India</i>          | 9                          | 8                                      | 0                      | 1                 | 6             | 3                                 | 1                               | 3                 | 3            | 34           |
| <i>Germany</i>        | 11                         | 3                                      | 1                      | 1                 | 9             | 3                                 | 1                               | 1                 | 0            | 30           |
| <i>United Kingdom</i> | 5                          | 4                                      | 5                      | 2                 | 6             | 2                                 | 2                               | 1                 | 1            | 28           |
| <i>South Korea</i>    | 8                          | 4                                      | 0                      | 0                 | 7             | 0                                 | 0                               | 0                 | 2            | 21           |
| <i>Switzerland</i>    | 6                          | 2                                      | 2                      | 0                 | 6             | 4                                 | 0                               | 0                 | 0            | 20           |
| <i>France</i>         | 2                          | 4                                      | 2                      | 0                 | 4             | 4                                 | 1                               | 1                 | 1            | 19           |
| <i>Spain</i>          | 1                          | 7                                      | 0                      | 1                 | 4             | 1                                 | 3                               | 2                 | 0            | 19           |
| <i>Mexico</i>         | 1                          | 3                                      | 3                      | 0                 | 3             | 4                                 | 2                               | 0                 | 1            | 17           |
| <i>Netherlands</i>    | 4                          | 1                                      | 1                      | 0                 | 5             | 2                                 | 0                               | 1                 | 2            | 16           |
| <i>Italy</i>          | 3                          | 4                                      | 0                      | 0                 | 4             | 1                                 | 1                               | 1                 | 1            | 15           |
| <i>Australia</i>      | 2                          | 4                                      | 0                      | 0                 | 4             | 4                                 | 0                               | 0                 | 1            | 15           |
| <i>Russia</i>         | 1                          | 9                                      | 0                      | 0                 | 1             | 0                                 | 1                               | 1                 | 0            | 13           |
| <i>Hong Kong</i>      | 1                          | 3                                      | 0                      | 0                 | 6             | 0                                 | 1                               | 0                 | 2            | 13           |
| <i>Saudi Arabia</i>   | 1                          | 3                                      | 1                      | 0                 | 3             | 0                                 | 0                               | 0                 | 0            | 8            |
| <i>Belgium</i>        | 1                          | 1                                      | 1                      | 0                 | 2             | 0                                 | 0                               | 1                 | 0            | 6            |
| <i>Other</i>          | 3                          | 12                                     | 4                      | 0                 | 5             | 2                                 | 4                               | 10                | 3            | 43           |
| <i>Total</i>          | 393                        | 598                                    | 107                    | 75                | 656           | 180                               | 99                              | 74                | 58           | 2240         |
